# Supplementary material
Source: MDPI journal article supplement (https://www.mdpi.com/1999-4893/16/5/257)
Supplement: s1 [file s1]

**Table S1.** Collected data for 1-3 road type (-1-RS state road (1st class), 2-RS state road (2nd class), 3-Serbia two lane).

|    | Country | Road Type | Mark | SL (m) | AADT<br>(veh/day) | TT | TA  | Slopes | Lane<br>width |
|----|---------|-----------|------|--------|-------------------|----|-----|--------|---------------|
| 1  | RS      | 1         | 157  | 7193   | 1306              | 1  | 16  | 2      | >6m           |
| 2  | RS      | 1         | 154  | 23254  | 1328              | 1  | 17  | 2      | >6m           |
| 3  | RS      | 1         | 155  | 2718   | 7340              | 1  | 9   | 2      | >6m           |
| 4  | RS      | 1         | 156  | 6532   | 2638              | 1  | 13  | 2      | >6m           |
| 5  | RS      | 1         | 153  | 25681  | 4327              | 1  | 25  | 2      | >6m           |
| 6  | RS      | 1         | 385  | 5734   | 5567              | 1  | 20  | 2      | >6m           |
| 7  | RS      | 1         | 390  | 2649   | 8969              | 1  | 8   | 2      | >6m           |
| 8  | RS      | 1         | 389  | 1999   | 4604              | 1  | 5   | 2      | >6m           |
| 9  | RS      | 1         | 382  | 26756  | 1753              | 1  | 27  | 2      | >6m           |
| 10 | RS      | 1         | 419  | 6500   | 4817              | 1  | 21  | 2      | >6m           |
| 11 | RS      | 1         | 399  | 1682   | 4620              | 1  | 14  | 2      | >6m           |
| 12 | RS      | 1         | 400  | 13427  | 2689              | 1  | 21  | 2      | >6m           |
| 13 | RS      | 1         | 386  | 20979  | 2867              | 1  | 29  | 2      | >6m           |
| 14 | RS      | 1         | 391  | 21991  | 4748              | 1  | 23  | 2      | >6m           |
| 15 | RS      | 1         | 387  | 20035  | 4712              | 1  | 8   | 2      | >6m           |
| 16 | RS      | 1         | 421  | 1387   | 3974              | 1  | 2   | 2      | >6m           |
| 17 | RS      | 1         | 168  | 19226  | 561               | 3  | 2   | 2      | >6m           |
| 18 | RS      | 1         | 158  | 32205  | 2275              | 2  | 52  | 2      | >6m           |
| 19 | RS      | 1         | 159  | 2679   | 8399              | 1  | 10  | 2      | >6m           |
| 20 | RS      | 1         | 167  | 19145  | 1137              | 2  | 4   | 2      | >6m           |
| 21 | RS      | 1         | 160  | 21126  | 3352              | 1  | 35  | 2      | >6m           |
| 22 | RS      | 1         | 190  | 6535   | 1401              | 2  | 4   | 2      | >6m           |
| 23 | RS      | 1         | 180  | 12255  | 9989              | 1  | 86  | 2      | >6m           |
| 24 | RS      | 1         | 189  | 32786  | 3716              | 2  | 97  | 2      | >6m           |
| 25 | RS      | 1         | 182  | 659    | 22913             | 1  | 7   | 2      | >6m           |
| 26 | RS      | 1         | 183  | 8347   | 13864             | 1  | 70  | 2      | >6m           |
| 27 | RS      | 1         | 181  | 19776  | 9483              | 1  | 144 | 2      | >6m           |
| 28 | RS      | 1         | 188  | 6692   | 7102              | 1  | 41  | 2      | >6m           |
| 29 | RS      | 1         | 213  | 14303  | 5487              | 1  | 25  | 2      | >6m           |
| 30 | RS      | 1         | 220  | 4622   | 14921             | 1  | 26  | 2      | >6m           |
| 31 | RS      | 1         | 210  | 1322   | 4624              | 1  | 2   | 2      | >6m           |
| 32 | RS      | 1         | 218  | 5978   | 9197              | 1  | 19  | 2      | >6m           |
| 33 | RS      | 1         | 214  | 1350   | 6345              | 1  | 10  | 2      | >6m           |
| 34 | RS      | 1         | 216  | 10452  | 4277              | 1  | 12  | 2      | >6m           |
| 35 | RS      | 1         | 219  | 6307   | 14284             | 1  | 84  | 2      | >6m           |
| 36 | RS      | 1         | 211  | 1484   | 5378              | 1  | 6   | 2      | >6m           |
| 37 | RS      | 1         | 212  | 2876   | 5357              | 1  | 9   | 2      | >6m           |
| 38 | RS      | 1         | 217  | 5577   | 8699              | 1  | 10  | 2      | >6m           |
| 39 | RS      | 1         | 215  | 16232  | 4203              | 1  | 15  | 2      | >6m           |
| 40 | RS      | 1         | 450  | 6871   | 5992              | 2  | 11  | 2      | >6m           |
| 41 | RS      | 1         | 451  | 14073  | 4421              | 1  | 16  | 2      | >6m           |
| 42 | RS      | 1         | 273  | 580    | 6833              | 1  | 7   | 2      | >6m           |

|    |    |   |     |       |       |   |    |   |     |
|----|----|---|-----|-------|-------|---|----|---|-----|
| 43 | RS | 1 | 326 | 3559  | 4550  | 1 | 4  | 2 | >6m |
| 44 | RS | 1 | 277 | 1788  | 3109  | 1 | 4  | 2 | >6m |
| 45 | RS | 1 | 275 | 11265 | 3387  | 1 | 19 | 2 | >6m |
| 46 | RS | 1 | 274 | 5165  | 7839  | 1 | 31 | 2 | >6m |
| 47 | RS | 1 | 327 | 6858  | 5518  | 1 | 13 | 2 | >6m |
| 48 | RS | 1 | 280 | 11972 | 1962  | 2 | 12 | 2 | >6m |
| 49 | RS | 1 | 255 | 1840  | 6957  | 1 | 1  | 2 | >6m |
| 50 | RS | 1 | 256 | 10805 | 2510  | 1 | 7  | 2 | >6m |
| 51 | RS | 1 | 250 | 15135 | 5496  | 1 | 14 | 2 | >6m |
| 52 | RS | 1 | 254 | 15450 | 6637  | 2 | 18 | 2 | >6m |
| 53 | RS | 1 | 278 | 12021 | 1732  | 2 | 21 | 2 | >6m |
| 54 | RS | 1 | 253 | 1675  | 8060  | 2 | 3  | 2 | >6m |
| 55 | RS | 1 | 456 | 8298  | 3909  | 1 | 3  | 2 | >6m |
| 56 | RS | 1 | 287 | 7242  | 2905  | 2 | 9  | 2 | >6m |
| 57 | RS | 1 | 291 | 269   | 4402  | 3 | 6  | 2 | >6m |
| 58 | RS | 1 | 292 | 27483 | 1853  | 3 | 29 | 2 | >6m |
| 59 | RS | 1 | 286 | 17977 | 4079  | 1 | 72 | 2 | >6m |
| 60 | RS | 1 | 285 | 734   | 13389 | 1 | 3  | 2 | >6m |
| 61 | RS | 1 | 288 | 11558 | 2822  | 2 | 27 | 2 | >6m |
| 62 | RS | 1 | 289 | 12775 | 2943  | 2 | 20 | 2 | >6m |
| 63 | RS | 1 | 294 | 21559 | 3993  | 2 | 60 | 2 | >6m |
| 64 | RS | 1 | 293 | 3598  | 7381  | 2 | 16 | 2 | >6m |
| 65 | RS | 1 | 295 | 5030  | 5469  | 2 | 32 | 2 | >6m |
| 66 | RS | 1 | 284 | 20950 | 6408  | 1 | 77 | 2 | >6m |
| 67 | RS | 1 | 290 | 20317 | 2123  | 3 | 20 | 2 | >6m |
| 68 | RS | 1 | 457 | 9321  | 1612  | 2 | 9  | 2 | >6m |
| 69 | RS | 1 | 460 | 28598 | 2764  | 2 | 59 | 2 | >6m |
| 70 | RS | 1 | 461 | 6422  | 2552  | 2 | 19 | 2 | >6m |
| 71 | RS | 1 | 41  | 15350 | 3704  | 1 | 32 | 2 | >6m |
| 72 | RS | 1 | 8   | 10451 | 6763  | 1 | 30 | 2 | >6m |
| 73 | RS | 1 | 3   | 534   | 5256  | 1 | 2  | 2 | >6m |
| 74 | RS | 1 | 40  | 3140  | 4305  | 1 | 1  | 2 | >6m |
| 75 | RS | 1 | 12  | 14967 | 9668  | 1 | 79 | 2 | >6m |
| 76 | RS | 1 | 42  | 350   | 19379 | 1 | 1  | 2 | >6m |
| 77 | RS | 1 | 43  | 240   | 2558  | 1 | 3  | 2 | >6m |
| 78 | RS | 1 | 20  | 16734 | 6498  | 1 | 18 | 2 | >6m |
| 79 | RS | 1 | 18  | 11590 | 6422  | 2 | 28 | 2 | >6m |
| 80 | RS | 1 | 10  | 8739  | 8120  | 1 | 22 | 2 | >6m |
| 81 | RS | 1 | 11  | 13752 | 6007  | 1 | 30 | 2 | >6m |
| 82 | RS | 1 | 4   | 753   | 5523  | 1 | 3  | 2 | >6m |
| 83 | RS | 1 | 5   | 951   | 6002  | 1 | 4  | 2 | >6m |
| 84 | RS | 1 | 6   | 6026  | 4401  | 1 | 6  | 2 | >6m |
| 85 | RS | 1 | 19  | 20134 | 4143  | 2 | 8  | 2 | >6m |
| 86 | RS | 1 | 9   | 10429 | 10280 | 1 | 66 | 2 | >6m |
| 87 | RS | 1 | 13  | 918   | 7156  | 1 | 12 | 2 | >6m |
| 88 | RS | 1 | 21  | 6646  | 9216  | 1 | 8  | 2 | >6m |
| 89 | RS | 1 | 15  | 2728  | 16000 | 1 | 9  | 2 | >6m |

|     |    |   |     |       |       |   |    |   |     |
|-----|----|---|-----|-------|-------|---|----|---|-----|
| 90  | RS | 1 | 100 | 10950 | 2794  | 2 | 6  | 2 | >6m |
| 91  | RS | 1 | 65  | 10605 | 2552  | 1 | 12 | 2 | >6m |
| 92  | RS | 1 | 105 | 6226  | 994   | 1 | 13 | 2 | >6m |
| 93  | RS | 1 | 90  | 6884  | 7784  | 1 | 34 | 2 | >6m |
| 94  | RS | 1 | 64  | 13812 | 2369  | 1 | 13 | 2 | >6m |
| 95  | RS | 1 | 68  | 1145  | 2180  | 1 | 1  | 2 | >6m |
| 96  | RS | 1 | 91  | 4460  | 5330  | 2 | 11 | 2 | >6m |
| 97  | RS | 1 | 99  | 2840  | 2132  | 1 | 2  | 2 | >6m |
| 98  | RS | 1 | 67  | 11627 | 2749  | 2 | 10 | 2 | >6m |
| 99  | RS | 1 | 92  | 15660 | 1932  | 2 | 16 | 2 | >6m |
| 100 | RS | 1 | 66  | 6003  | 3301  | 2 | 9  | 2 | >6m |
| 101 | RS | 1 | 97  | 11195 | 2424  | 1 | 9  | 2 | >6m |
| 102 | RS | 1 | 98  | 12890 | 2005  | 1 | 8  | 2 | >6m |
| 103 | RS | 1 | 101 | 660   | 3404  | 1 | 14 | 2 | >6m |
| 104 | RS | 1 | 102 | 320   | 6513  | 1 | 1  | 2 | >6m |
| 105 | RS | 1 | 104 | 12610 | 1559  | 1 | 7  | 2 | >6m |
| 106 | RS | 1 | 132 | 15818 | 1537  | 2 | 13 | 2 | >6m |
| 107 | RS | 1 | 136 | 40798 | 1249  | 1 | 37 | 2 | >6m |
| 108 | RS | 1 | 133 | 16615 | 1367  | 2 | 9  | 2 | >6m |
| 109 | RS | 1 | 137 | 2122  | 9357  | 1 | 13 | 2 | >6m |
| 110 | RS | 1 | 138 | 15908 | 1056  | 1 | 24 | 2 | >6m |
| 111 | RS | 1 | 139 | 8999  | 523   | 1 | 3  | 2 | >6m |
| 112 | RS | 1 | 373 | 10668 | 2290  | 2 | 1  | 2 | >6m |
| 113 | RS | 1 | 377 | 38210 | 1319  | 2 | 4  | 2 | >6m |
| 114 | RS | 1 | 374 | 434   | 4783  | 2 | 9  | 2 | >6m |
| 115 | RS | 1 | 375 | 280   | 8799  | 2 | 1  | 2 | >6m |
| 116 | RS | 1 | 376 | 11410 | 1810  | 2 | 4  | 2 | >6m |
| 117 | RS | 1 | 142 | 195   | 3065  | 2 | 7  | 2 | >6m |
| 118 | RS | 1 | 143 | 5335  | 932   | 2 | 4  | 2 | >6m |
| 119 | RS | 2 | 722 | 32400 | 1013  | 1 | 1  | 2 | >6m |
| 120 | RS | 2 | 731 | 12121 | 2233  | 1 | 2  | 1 | >6m |
| 121 | RS | 2 | 736 | 11765 | 3627  | 1 | 14 | 2 | >6m |
| 122 | RS | 2 | 737 | 8345  | 4527  | 1 | 14 | 2 | >6m |
| 123 | RS | 2 | 741 | 11999 | 1078  | 1 | 3  | 2 | >6m |
| 124 | RS | 2 | 740 | 1106  | 2411  | 1 | 2  | 2 | >6m |
| 125 | RS | 2 | 744 | 2007  | 901   | 1 | 4  | 2 | >6m |
| 126 | RS | 2 | 745 | 3953  | 3574  | 1 | 6  | 2 | >6m |
| 127 | RS | 2 | 755 | 31782 | 1308  | 1 | 25 | 2 | >6m |
| 128 | RS | 2 | 754 | 10980 | 1557  | 1 | 11 | 2 | >6m |
| 129 | RS | 2 | 753 | 21062 | 1786  | 1 | 21 | 2 | >6m |
| 130 | RS | 2 | 756 | 25000 | 1043  | 1 | 7  | 2 | >6m |
| 131 | RS | 2 | 768 | 25959 | 815   | 2 | 3  | 2 | >6m |
| 132 | RS | 2 | 765 | 45100 | 411   | 3 | 3  | 2 | >6m |
| 133 | RS | 2 | 771 | 26025 | 814   | 2 | 9  | 2 | >6m |
| 134 | RS | 2 | 781 | 16905 | 1601  | 2 | 12 | 2 | >6m |
| 135 | RS | 2 | 782 | 25744 | 1081  | 1 | 12 | 2 | >6m |
| 136 | RS | 2 | 783 | 1643  | 12504 | 1 | 8  | 2 | >6m |

|     |        |   |      |       |       |   |    |   |     |
|-----|--------|---|------|-------|-------|---|----|---|-----|
| 137 | RS     | 2 | 784  | 241   | 10280 | 1 | 87 | 2 | >6m |
| 138 | RS     | 2 | 785  | 31349 | 2337  | 1 | 13 | 2 | >6m |
| 139 | RS     | 2 | 787  | 241   | 9705  | 1 | 19 | 2 | >6m |
| 140 | RS     | 2 | 789  | 821   | 4287  | 1 | 2  | 2 | >6m |
| 141 | RS     | 2 | 790  | 15431 | 3296  | 2 | 11 | 2 | >6m |
| 142 | RS     | 2 | 791  | 838   | 1845  | 1 | 6  | 2 | >6m |
| 143 | RS     | 2 | 792  | 12133 | 914   | 1 | 1  | 2 | >6m |
| 144 | RS     | 2 | 796  | 21705 | 4649  | 2 | 19 | 2 | >6m |
| 145 | RS     | 2 | 797  | 17800 | 344   | 1 | 2  | 2 | >6m |
| 146 | RS     | 2 | 799  | 22000 | 365   | 1 | 1  | 2 | >6m |
| 147 | RS     | 2 | 800  | 25244 | 3427  | 2 | 21 | 2 | >6m |
| 148 | RS     | 2 | 801  | 23000 | 1706  | 2 | 8  | 2 | >6m |
| 149 | RS     | 2 | 802  | 28127 | 1110  | 2 | 1  | 2 | >6m |
| 150 | RS     | 2 | 805  | 15004 | 2398  | 1 | 7  | 2 | >6m |
| 151 | RS     | 2 | 803  | 17500 | 918   | 1 | 3  | 2 | >6m |
| 152 | RS     | 2 | 804  | 30260 | 605   | 1 | 2  | 2 | >6m |
| 153 | RS     | 2 | 806  | 22000 | 1434  | 1 | 4  | 2 | >6m |
| 154 | RS     | 2 | 807  | 31000 | 1247  | 1 | 3  | 2 | >6m |
| 155 | RS     | 2 | 809  | 9234  | 10238 | 1 | 39 | 2 | >6m |
| 156 | RS     | 2 | 811  | 21650 | 1557  | 1 | 5  | 2 | >6m |
| 157 | RS     | 2 | 487  | 28451 | 1683  | 2 | 77 | 2 | >6m |
| 158 | RS     | 2 | 494  | 20425 | 471   | 1 | 7  | 2 | >6m |
| 159 | RS     | 2 | 495  | 20916 | 1315  | 1 | 3  | 2 | >6m |
| 160 | RS     | 2 | 519  | 42772 | 3434  | 2 | 38 | 2 | >6m |
| 161 | RS     | 2 | 520  | 13582 | 2815  | 2 | 24 | 2 | >6m |
| 162 | RS     | 2 | 521  | 19091 | 445   | 2 | 1  | 2 | >6m |
| 163 | RS     | 2 | 522  | 14215 | 506   | 2 | 18 | 2 | >6m |
| 164 | RS     | 2 | 532  | 35822 | 1030  | 2 | 47 | 2 | >6m |
| 165 | RS     | 2 | 533  | 11102 | 1177  | 1 | 7  | 2 | >6m |
| 166 | RS     | 2 | 534  | 29389 | 602   | 2 | 15 | 2 | >6m |
| 167 | RS     | 2 | 537  | 16000 | 254   | 2 | 3  | 2 | >6m |
| 168 | RS     | 2 | 574  | 32287 | 319   | 1 | 1  | 2 | >6m |
| 169 | RS     | 2 | 577  | 28605 | 1204  | 1 | 10 | 2 | >6m |
| 170 | RS     | 2 | 576  | 13311 | 1395  | 1 | 3  | 2 | >6m |
| 171 | RS     | 2 | 582  | 14476 | 1201  | 2 | 8  | 2 | >6m |
| 172 | RS     | 2 | 585  | 7067  | 983   | 2 | 4  | 2 | >6m |
| 173 | RS     | 2 | 584  | 49492 | 188   | 1 | 3  | 2 | >6m |
| 174 | RS     | 2 | 589  | 16780 | 417   | 1 | 4  | 2 | >6m |
| 175 | RS     | 2 | 590  | 6040  | 525   | 1 | 1  | 2 | >6m |
| 176 | RS     | 2 | 594  | 16707 | 109   | 1 | 1  | 2 | >6m |
| 177 | RS     | 2 | 598  | 29350 | 458   | 2 | 1  | 2 | >6m |
| 178 | RS     | 2 | 599  | 31904 | 640   | 2 | 7  | 3 | >6m |
| 179 | RS     | 2 | 614  | 34000 | 745   | 2 | 5  | 2 | >6m |
| 180 | RS     | 2 | 653  | 5000  | 928   | 2 | 16 | 2 | >6m |
| 181 | Serbia | 3 | 2201 | 7500  | 25581 | 2 | 37 | 2 | >6m |
| 182 | Serbia | 3 | 2202 | 2200  | 19335 | 2 | 10 | 2 | >6m |
| 183 | Serbia | 3 | 2203 | 2700  | 17472 | 2 | 8  | 1 | >6m |

|     |        |   |      |       |       |   |    |   |     |
|-----|--------|---|------|-------|-------|---|----|---|-----|
| 184 | Serbia | 3 | 2204 | 3100  | 13275 | 2 | 10 | 1 | >6m |
| 185 | Serbia | 3 | 2205 | 600   | 13142 | 1 | 2  | 1 | >6m |
| 186 | Serbia | 3 | 2206 | 12700 | 9619  | 1 | 27 | 1 | >6m |
| 187 | Serbia | 3 | 2208 | 14400 | 8615  | 1 | 20 | 1 | >6m |
| 188 | Serbia | 3 | 2209 | 4500  | 12701 | 1 | 11 | 1 | >6m |
| 189 | Serbia | 3 | 2210 | 4100  | 6166  | 1 | 2  | 1 | >6m |
| 190 | Serbia | 3 | 2211 | 6400  | 4953  | 1 | 3  | 1 | >6m |
| 191 | Serbia | 3 | 2212 | 8800  | 4231  | 1 | 4  | 1 | >6m |
| 192 | Serbia | 3 | 2239 | 800   | 4442  | 1 | 1  | 1 | >6m |
| 193 | Serbia | 3 | 2240 | 800   | 5447  | 1 | 1  | 1 | >6m |
| 194 | Serbia | 3 | 2214 | 3100  | 4180  | 1 | 2  | 1 | >6m |
| 195 | Serbia | 3 | 2215 | 5700  | 2387  | 3 | 0  | 3 | >6m |
| 196 | Serbia | 3 | 2216 | 9700  | 2285  | 3 | 5  | 3 | >6m |
| 197 | Serbia | 3 | 2217 | 10700 | 2176  | 3 | 1  | 3 | >6m |
| 198 | Serbia | 3 | 2218 | 9600  | 5078  | 3 | 1  | 3 | >6m |
| 199 | Serbia | 3 | 2219 | 2700  | 6674  | 1 | 2  | 2 | >6m |
| 200 | Serbia | 3 | 2237 | 14500 | 10026 | 2 | 17 | 2 | >6m |
| 201 | Serbia | 3 | 2238 | 800   | 11749 | 1 | 6  | 1 | >6m |
| 202 | Serbia | 3 | 2221 | 12300 | 13860 | 1 | 23 | 1 | >6m |
| 203 | Serbia | 3 | 2222 | 19900 | 8579  | 1 | 43 | 1 | >6m |
| 204 | Serbia | 3 | 2224 | 6800  | 10056 | 3 | 8  | 3 | >6m |
| 205 | Serbia | 3 | 2225 | 39100 | 7079  | 3 | 34 | 3 | >6m |
| 206 | Serbia | 3 | 2226 | 5200  | 5167  | 3 | 8  | 3 | >6m |
| 207 | Serbia | 3 | 2227 | 9600  | 4956  | 3 | 16 | 3 | >6m |
| 208 | Serbia | 3 | 2228 | 8200  | 6043  | 3 | 10 | 3 | >6m |
| 209 | Serbia | 3 | 2229 | 9300  | 6808  | 3 | 17 | 3 | >6m |
| 210 | Serbia | 3 | 2231 | 17400 | 7179  | 3 | 19 | 3 | >6m |
| 211 | Serbia | 3 | 2232 | 300   | 10635 | 3 | 3  | 3 | >6m |
| 212 | Serbia | 3 | 2234 | 24400 | 7372  | 3 | 52 | 3 | >6m |
| 213 | Serbia | 3 | 2235 | 12600 | 2979  | 3 | 7  | 3 | >6m |
| 214 | Serbia | 3 | 2236 | 3400  | 1966  | 3 | 1  | 3 | >6m |
| 215 | Serbia | 3 | 2301 | 3900  | 9011  | 1 | 13 | 1 | >6m |
| 216 | Serbia | 3 | 2302 | 11900 | 10193 | 1 | 16 | 1 | >6m |
| 217 | Serbia | 3 | 2303 | 6700  | 6209  | 1 | 5  | 1 | >6m |
| 218 | Serbia | 3 | 2304 | 5000  | 5498  | 1 | 1  | 1 | >6m |
| 219 | Serbia | 3 | 2305 | 8500  | 8353  | 1 | 9  | 1 | >6m |
| 220 | Serbia | 3 | 2306 | 11200 | 11382 | 1 | 6  | 1 | >6m |
| 221 | Serbia | 3 | 2307 | 9100  | 9449  | 1 | 14 | 1 | >6m |
| 222 | Serbia | 3 | 2308 | 1200  | 9543  | 1 | 1  | 1 | >6m |
| 223 | Serbia | 3 | 2309 | 2200  | 9066  | 1 | 7  | 1 | >6m |
| 224 | Serbia | 3 | 2310 | 12700 | 8160  | 1 | 28 | 1 | >6m |
| 225 | Serbia | 3 | 2311 | 3600  | 4276  | 1 | 4  | 1 | >6m |
| 226 | Serbia | 3 | 2312 | 7100  | 9720  | 1 | 48 | 1 | >6m |
| 227 | Serbia | 3 | 2313 | 1800  | 21178 | 1 | 7  | 1 | >6m |
| 228 | Serbia | 3 | 2314 | 4400  | 19059 | 1 | 17 | 1 | >6m |
| 229 | Serbia | 3 | 2315 | 1300  | 17125 | 1 | 5  | 1 | >6m |
| 230 | Serbia | 3 | 2316 | 7000  | 15191 | 1 | 16 | 1 | >6m |

|     |        |   |      |       |       |   |    |   |      |
|-----|--------|---|------|-------|-------|---|----|---|------|
| 231 | Serbia | 3 | 2317 | 17900 | 11940 | 3 | 26 | 2 | >6m  |
| 232 | Serbia | 3 | 2318 | 5000  | 11249 | 3 | 11 | 2 | >6m  |
| 233 | Serbia | 3 | 2319 | 2900  | 9111  | 1 | 5  | 1 | >6m  |
| 234 | Serbia | 3 | 2320 | 22100 | 13483 | 2 | 70 | 2 | >6m  |
| 235 | Serbia | 3 | 2321 | 7700  | 13465 | 2 | 32 | 2 | >6m  |
| 236 | Serbia | 3 | 2322 | 7000  | 13447 | 3 | 14 | 2 | >6m  |
| 237 | Serbia | 3 | 2323 | 7700  | 13136 | 3 | 10 | 2 | >6m  |
| 238 | Serbia | 3 | 2324 | 3700  | 5844  | 3 | 6  | 3 | >6m  |
| 239 | Serbia | 3 | 2325 | 27500 | 4541  | 3 | 18 | 3 | >6m  |
| 240 | Serbia | 3 | 2327 | 8300  | 4872  | 3 | 8  | 3 | >6m  |
| 241 | Serbia | 3 | 2328 | 15200 | 4854  | 3 | 13 | 3 | >6m  |
| 242 | Serbia | 3 | 2329 | 9900  | 5250  | 3 | 10 | 2 | >6m  |
| 243 | Serbia | 3 | 2330 | 5100  | 9065  | 3 | 12 | 2 | >6m  |
| 244 | Serbia | 3 | 2332 | 30200 | 3435  | 3 | 16 | 2 | >6m  |
| 245 | Serbia | 3 | 3301 | 600   | 6998  | 1 | 2  | 1 | >6m  |
| 246 | Serbia | 3 | 3302 | 1400  | 9525  | 1 | 0  | 1 | >6m  |
| 247 | Serbia | 3 | 3303 | 11100 | 11793 | 1 | 10 | 1 | >6m  |
| 248 | Serbia | 3 | 3304 | 1500  | 8665  | 1 | 1  | 1 | >6m  |
| 249 | Serbia | 3 | 3305 | 2200  | 4367  | 1 | 1  | 1 | >6m  |
| 250 | Serbia | 3 | 3306 | 2900  | 4586  | 1 | 2  | 1 | 5-6m |
| 251 | Serbia | 3 | 3307 | 5300  | 6742  | 1 | 4  | 2 | 5-6m |
| 252 | Serbia | 3 | 3325 | 14200 | 2414  | 1 | 8  | 2 | 5-6m |
| 253 | Serbia | 3 | 3309 | 4900  | 1848  | 2 | 1  | 2 | 5-6m |
| 254 | Serbia | 3 | 3310 | 10900 | 2067  | 2 | 3  | 2 | 5-6m |
| 255 | Serbia | 3 | 3311 | 6100  | 1598  | 2 | 1  | 2 | 5-6m |
| 256 | Serbia | 3 | 3312 | 8100  | 2193  | 2 | 12 | 2 | 5-6m |
| 257 | Serbia | 3 | 3313 | 40900 | 1953  | 3 | 20 | 3 | 5-6m |
| 258 | Serbia | 3 | 3314 | 8800  | 1471  | 3 | 3  | 3 | 5-6m |
| 259 | Serbia | 3 | 3315 | 25200 | 809   | 3 | 10 | 3 | 5-6m |
| 260 | Serbia | 3 | 3316 | 7300  | 728   | 2 | 2  | 2 | >6m  |
| 261 | Serbia | 3 | 3317 | 11100 | 491   | 3 | 1  | 3 | >6m  |
| 262 | Serbia | 3 | 3318 | 7900  | 640   | 2 | 1  | 2 | >6m  |
| 263 | Serbia | 3 | 3319 | 14900 | 1181  | 2 | 2  | 2 | >6m  |
| 264 | Serbia | 3 | 3320 | 1300  | 3725  | 1 | 1  | 2 | >6m  |
| 265 | Serbia | 3 | 3322 | 11000 | 2344  | 2 | 8  | 2 | >6m  |
| 266 | Serbia | 3 | 3323 | 2200  | 244   | 2 | 1  | 2 | >6m  |
| 267 | Serbia | 3 | 3401 | 5200  | 5479  | 1 | 6  | 1 | >6m  |
| 268 | Serbia | 3 | 3402 | 2700  | 4486  | 1 | 7  | 1 | >6m  |
| 269 | Serbia | 3 | 3403 | 5100  | 7879  | 1 | 15 | 1 | >6m  |
| 270 | Serbia | 3 | 3404 | 200   | 6553  | 1 | 1  | 1 | 5-6m |
| 271 | Serbia | 3 | 3405 | 6400  | 5191  | 1 | 10 | 1 | 5-6m |
| 272 | Serbia | 3 | 3406 | 12400 | 4127  | 1 | 18 | 1 | 5-6m |
| 273 | Serbia | 3 | 3407 | 12100 | 3921  | 2 | 17 | 2 | 5-6m |
| 274 | Serbia | 3 | 3408 | 2600  | 3269  | 2 | 2  | 2 | 5-6m |
| 275 | Serbia | 3 | 3409 | 9100  | 3078  | 2 | 6  | 2 | 5-6m |
| 276 | Serbia | 3 | 3410 | 51400 | 1254  | 3 | 14 | 2 | 5-6m |
| 277 | Serbia | 3 | 3411 | 9100  | 1914  | 3 | 5  | 2 | >6m  |

|     |        |   |          |       |      |   |    |   |      |
|-----|--------|---|----------|-------|------|---|----|---|------|
| 278 | Serbia | 3 | 3412     | 1800  | 917  | 3 | 1  | 2 | >6m  |
| 279 | Serbia | 3 | 3413     | 46900 | 840  | 3 | 7  | 2 | >6m  |
| 280 | Serbia | 3 | 3901     | 4200  | 2316 | 2 | 1  | 2 | >6m  |
| 281 | Serbia | 3 | 3902     | 15400 | 833  | 2 | 3  | 2 | >6m  |
| 282 | Serbia | 3 | 3903     | 4400  | 1843 | 3 | 3  | 3 | >6m  |
| 283 | Serbia | 3 | 3904     | 17300 | 1125 | 3 | 3  | 2 | 5–6m |
| 284 | Serbia | 3 | 3905     | 4100  | 731  | 3 | 0  | 2 | 5–6m |
| 285 | Serbia | 3 | 03906co1 | 11700 | 1392 | 3 | 4  | 3 | 5–6m |
| 286 | Serbia | 3 | 03906co2 | 4200  | 1809 | 3 | 14 | 3 | 5–6m |
| 287 | Serbia | 3 | 3907     | 7000  | 5697 | 1 | 10 | 1 | >6m  |
| 288 | Serbia | 3 | 3908     | 4800  | 5983 | 1 | 9  | 1 | >6m  |
| 289 | Serbia | 3 | 3912     | 19000 | 4552 | 1 | 13 | 1 | >6m  |
| 290 | Serbia | 3 | 3914     | 1600  | 1284 | 1 | 1  | 1 | >6m  |
| 291 | Serbia | 3 | 3915     | 17900 | 1377 | 3 | 4  | 3 | 5–6m |
| 292 | Serbia | 3 | 3916     | 7800  | 944  | 3 | 2  | 3 | 5–6m |
| 293 | Serbia | 3 | 3917     | 12400 | 341  | 3 | 2  | 3 | 5–6m |

Terrain type: level (1), rolling (2), mountains (3); curvature: minimal (1), severe (2), serpentine (3); lane width (>6m, 5-6m, <5m)

**Table S2.** Collected data for road 4 (Serbia highways)

|    | AADT  | SL   | TT | SPL | EI | DI | F | PDO | TA |
|----|-------|------|----|-----|----|----|---|-----|----|
| 1  | 7724  | 4.2  | 1  | 130 | 1  | 2  | 0 | 4   | 7  |
| 2  | 9347  | 12.6 | 1  | 130 | 0  | 1  | 1 | 8   | 10 |
| 3  | 10386 | 6.3  | 1  | 130 | 0  | 0  | 0 | 2   | 2  |
| 4  | 11049 | 3.5  | 1  | 130 | 0  | 0  | 0 | 3   | 3  |
| 5  | 11509 | 11.1 | 1  | 130 | 2  | 1  | 1 | 10  | 14 |
| 6  | 10039 | 12.4 | 1  | 130 | 5  | 1  | 0 | 8   | 14 |
| 7  | 11273 | 10.3 | 1  | 130 | 1  | 1  | 0 | 4   | 6  |
| 8  | 11219 | 10.4 | 1  | 130 | 1  | 0  | 0 | 8   | 9  |
| 9  | 11457 | 10.1 | 1  | 130 | 2  | 2  | 0 | 6   | 10 |
| 10 | 15283 | 12.8 | 1  | 130 | 3  | 1  | 0 | 7   | 11 |
| 11 | 16256 | 16.5 | 1  | 130 | 4  | 4  | 2 | 9   | 19 |
| 12 | 8928  | 1.7  | 1  | 130 | 1  | 1  | 0 | 0   | 2  |
| 13 | 8928  | 2.5  | 1  | 130 | 0  | 2  | 0 | 3   | 5  |
| 14 | 8928  | 4.5  | 1  | 130 | 0  | 0  | 0 | 2   | 2  |
| 15 | 24265 | 10.8 | 1  | 130 | 7  | 1  | 0 | 8   | 16 |
| 16 | 24437 | 12.9 | 1  | 130 | 6  | 4  | 2 | 16  | 28 |
| 17 | 24197 | 4.3  | 1  | 130 | 2  | 0  | 0 | 6   | 8  |
| 18 | 26344 | 4.8  | 1  | 130 | 1  | 0  | 1 | 5   | 7  |
| 19 | 27760 | 10.6 | 1  | 130 | 3  | 0  | 0 | 8   | 11 |
| 20 | 29666 | 2.8  | 1  | 130 | 0  | 2  | 0 | 5   | 7  |
| 21 | 34496 | 4.4  | 1  | 130 | 0  | 2  | 0 | 5   | 7  |
| 22 | 28286 | 6.2  | 1  | 130 | 7  | 2  | 0 | 12  | 21 |
| 23 | 39253 | 8.3  | 1  | 130 | 5  | 1  | 1 | 15  | 22 |
| 24 | 31771 | 3.6  | 1  | 130 | 2  | 1  | 0 | 11  | 14 |
| 25 | 30202 | 3.9  | 1  | 130 | 0  | 0  | 0 | 9   | 9  |
| 26 | 20341 | 6.1  | 1  | 130 | 3  | 3  | 1 | 11  | 18 |

|    |       |      |   |         |   |   |    |    |    |
|----|-------|------|---|---------|---|---|----|----|----|
| 27 | 16273 | 8.3  | 1 | 130     | 6 | 1 | 11 | 11 | 29 |
| 28 | 14043 | 4    | 2 | 100–130 | 4 | 0 | 0  | 3  | 7  |
| 29 | 44276 | 2.9  | 1 | 130     | 2 | 0 | 0  | 13 | 15 |
| 30 | 40620 | 4.4  | 2 | 130     | 1 | 0 | 1  | 5  | 7  |
| 31 | 39824 | 14.3 | 2 | 130     | 4 | 1 | 1  | 28 | 34 |
| 32 | 29959 | 6.5  | 2 | 130     | 1 | 0 | 0  | 6  | 7  |
| 33 | 29197 | 6    | 1 | 130     | 0 | 0 | 0  | 1  | 1  |
| 34 | 26898 | 6.3  | 1 | 130     | 2 | 1 | 0  | 8  | 11 |
| 35 | 27124 | 5.7  | 1 | 130     | 0 | 0 | 0  | 9  | 9  |
| 36 | 28844 | 1.5  | 1 | 130     | 1 | 0 | 0  | 3  | 4  |
| 37 | 24972 | 28.8 | 1 | 130     | 3 | 1 | 1  | 21 | 26 |
| 38 | 25396 | 11.7 | 1 | 130     | 1 | 1 | 0  | 2  | 4  |
| 39 | 25419 | 6.4  | 1 | 130     | 0 | 2 | 0  | 5  | 7  |
| 40 | 25934 | 3.8  | 1 | 130     | 0 | 1 | 0  | 4  | 5  |
| 41 | 19330 | 21.9 | 1 | 130     | 3 | 0 | 0  | 2  | 5  |
| 42 | 21680 | 12.8 | 1 | 130     | 1 | 0 | 0  | 4  | 5  |
| 43 | 21747 | 10.8 | 1 | 130     | 2 | 0 | 0  | 3  | 5  |
| 44 | 20451 | 12.1 | 1 | 130     | 0 | 1 | 0  | 3  | 4  |
| 45 | 17379 | 12.7 | 1 | 130     | 0 | 1 | 0  | 3  | 4  |
| 46 | 17068 | 20.4 | 1 | 130     | 6 | 2 | 0  | 13 | 21 |
| 47 | 17444 | 5    | 1 | 130     | 0 | 0 | 0  | 3  | 3  |
| 48 | 19363 | 21.1 | 1 | 130     | 5 | 0 | 0  | 13 | 18 |
| 49 | 12586 | 3.4  | 1 | 130     | 1 | 0 | 0  | 2  | 3  |
| 50 | 11384 | 5.6  | 1 | 130     | 2 | 0 | 0  | 1  | 3  |
| 51 | 10946 | 10.6 | 1 | 130     | 0 | 0 | 0  | 4  | 4  |
| 52 | 9742  | 6    | 1 | 130     | 1 | 0 | 0  | 0  | 1  |
| 53 | 8962  | 7.3  | 1 | 130     | 1 | 2 | 1  | 4  | 8  |
| 54 | 9720  | 16.2 | 1 | 130     | 2 | 2 | 1  | 2  | 7  |
| 55 | 9332  | 11   | 2 | 100–130 | 0 | 1 | 0  | 4  | 5  |
| 56 | 8777  | 10.4 | 2 | 100–130 | 0 | 0 | 0  | 0  | 0  |
| 57 | 8200  | 14.2 | 2 | 100–130 | 1 | 1 | 0  | 4  | 6  |
| 58 | 6901  | 22.8 | 2 | 100–130 | 2 | 0 | 0  | 4  | 6  |
| 59 | 6334  | 13.5 | 1 | 130     | 2 | 2 | 0  | 2  | 6  |
| 60 | 5717  | 3.6  | 1 | 130     | 0 | 0 | 0  | 1  | 1  |
| 61 | 5574  | 20.7 | 1 | 130     | 0 | 0 | 0  | 4  | 4  |
| 62 | 5737  | 6.1  | 1 | 130     | 0 | 0 | 0  | 4  | 4  |
| 63 | 66985 | 29.5 | 1 | 130     | 0 | 0 | 0  | 4  | 4  |
| 64 | 15986 | 16.4 | 1 | 130     | 3 | 0 | 0  | 29 | 32 |
| 65 | 15372 | 26.1 | 1 | 130     | 6 | 2 | 1  | 41 | 50 |
| 66 | 14276 | 12.5 | 1 | 130     | 4 | 1 | 0  | 8  | 13 |
| 67 | 11190 | 20.3 | 1 | 130     | 3 | 2 | 1  | 14 | 20 |
| 68 | 11607 | 26.2 | 2 | 100–130 | 7 | 0 | 0  | 10 | 17 |
| 69 | 11155 | 16.7 | 2 | 100–130 | 2 | 2 | 0  | 11 | 15 |
| 70 | 5591  | 2.1  | 1 | 130     | 2 | 1 | 0  | 9  | 12 |
| 71 | 6078  | 6.6  | 1 | 130     | 1 | 0 | 0  | 1  | 2  |
| 72 | 7482  | 13.8 | 1 | 130     | 1 | 1 | 0  | 5  | 7  |
| 73 | 10840 | 21.7 | 1 | 130     | 2 | 3 | 1  | 9  | 15 |



|    |       |      |   |     |   |   |   |    |    |
|----|-------|------|---|-----|---|---|---|----|----|
| 74 | 14122 | 13.6 | 1 | 130 | 3 | 3 | 1 | 16 | 23 |
| 75 | 17845 | 11.8 | 1 | 130 | 2 | 0 | 0 | 8  | 10 |
| 76 | 17906 | 14.8 | 1 | 130 | 6 | 0 | 0 | 19 | 25 |
| 77 | 20224 | 7.8  | 1 | 130 | 0 | 1 | 1 | 13 | 15 |
| 78 | 33557 | 3.3  | 1 | 130 | 1 | 3 | 0 | 17 | 21 |

AADT-annual average daily traffic, SL-section length (km), TT-terrain type, SPL-speed limit, EI-evident injury, DI-disabling injury, F-fatality, PDO-property damage, TA-traffic accident
